# Supplementary material for: PINK1-induced mitophagy promotes neuroprotection in Huntington's disease
Source: PubMed Central journal article supplement (PMC4669776; doi:10.1038/cddis.2014.581), 2015-01-22

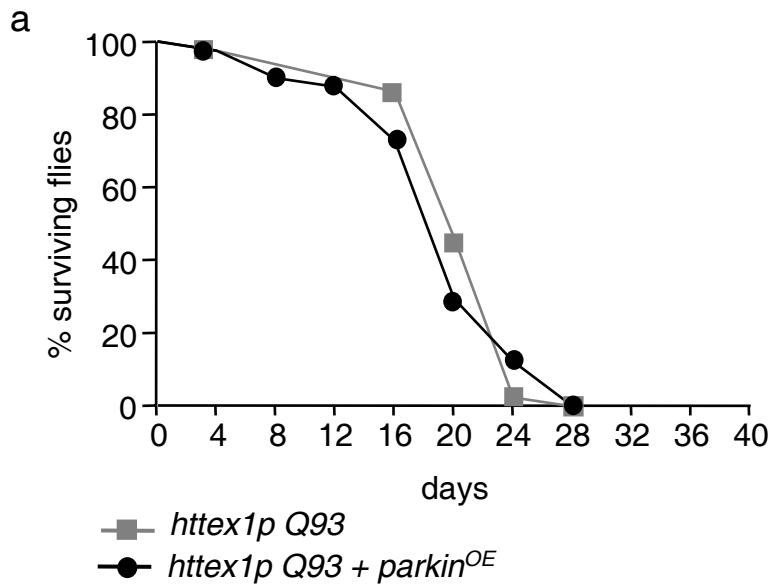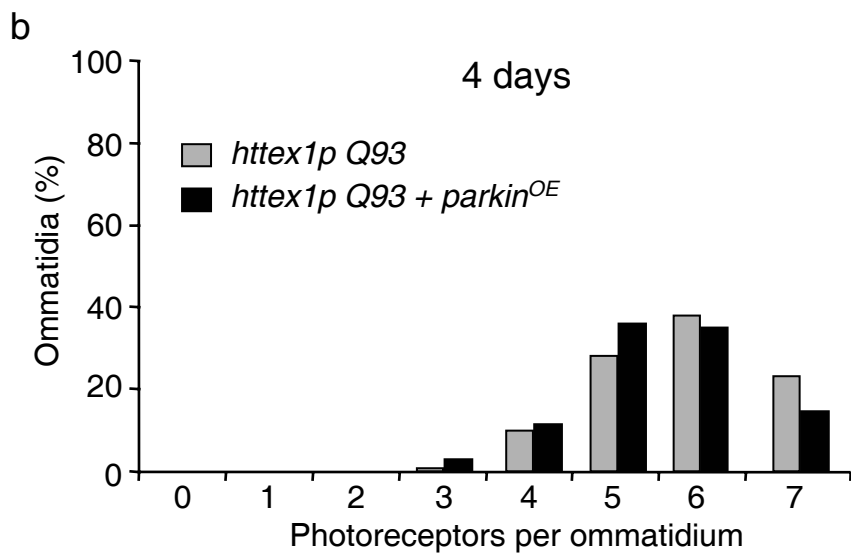

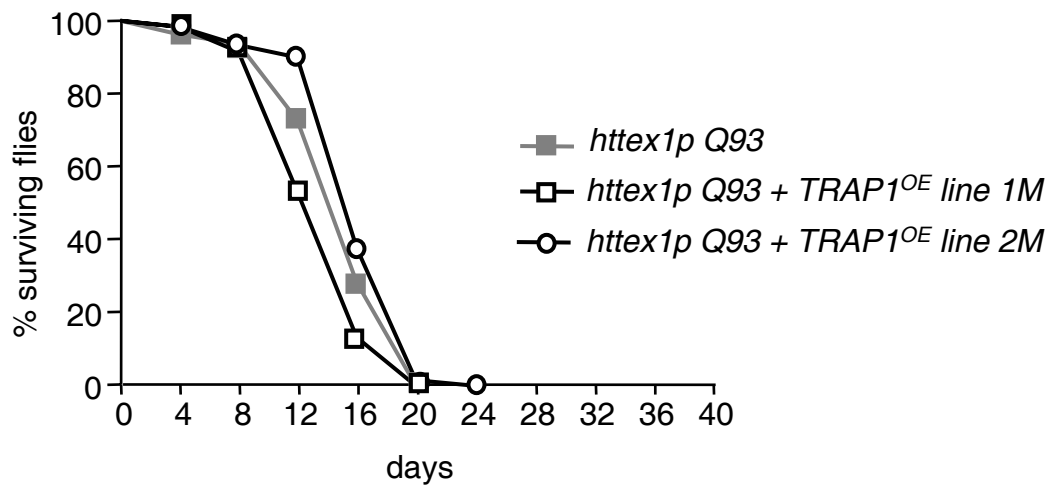

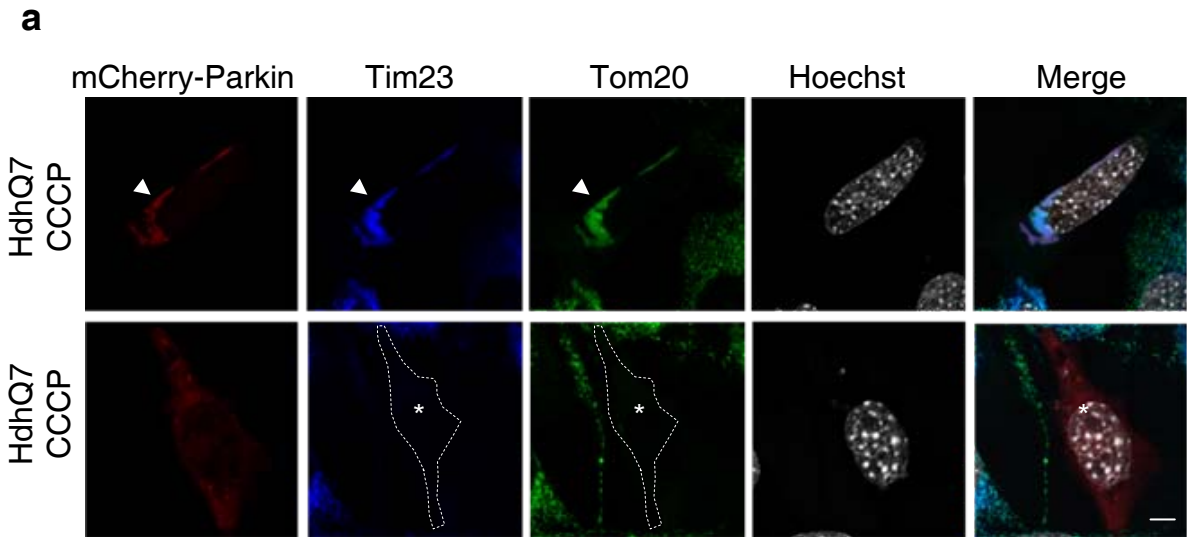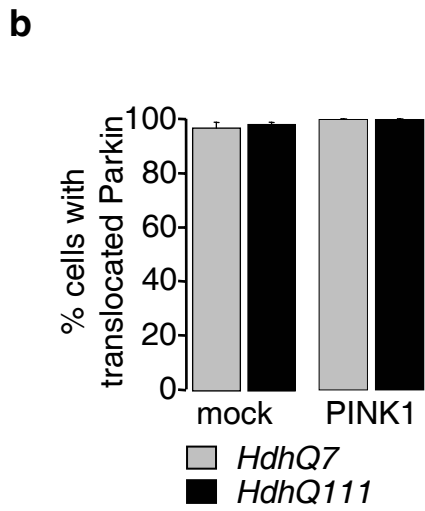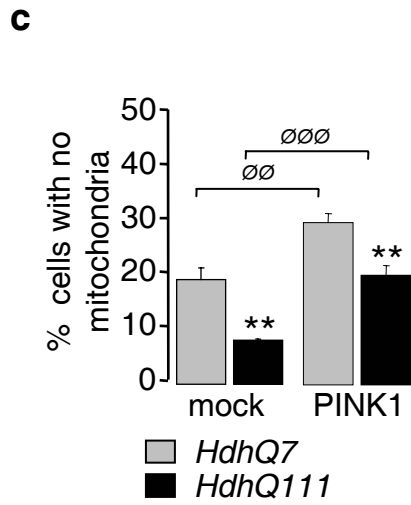

Supplement: cddis2014581x1.pdf [file cddis2014581x1.pdf]
